# Supplementary material for: Role of the Photorhabdus Dam methyltransferase during interactions with its invertebrate hosts
Source: PubMed Central journal article supplement (PMC6785176; doi:10.1371/journal.pone.0212655), 2019-10-09
Supplement: pone.0212655.s001.pdf [file pone.0212655.s001.pdf]

Fig. S1

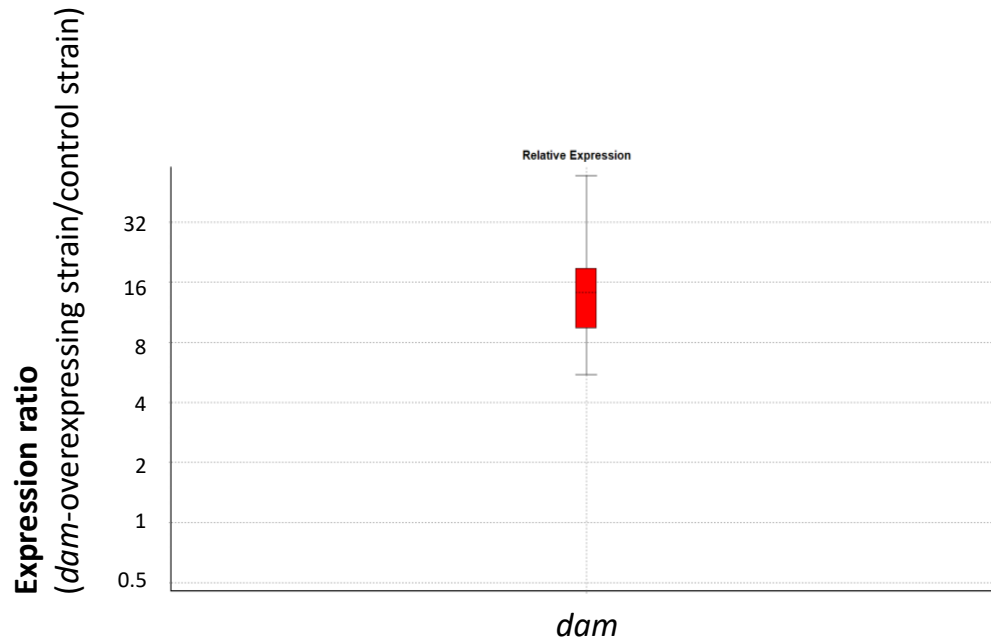

### Relative Expression Results

| Parameter  | Value |
|------------|-------|
| Iterations | 2000  |

  

| Gene | Type | Reaction Efficiency | Expression | Std. Error     | 95% C.I.       | P(H1) | Result |
|------|------|---------------------|------------|----------------|----------------|-------|--------|
| GyrB | REF  | 0,7929              | 1,157      |                |                |       |        |
| Dam  | TRG  | 1,1132              | 14,217     | 8,224 - 23,010 | 5,785 - 41,381 | 0,000 | UP     |
| fis  | REF  | 0,7791              | 0,864      |                |                |       |        |

#### Interpretation

Dam is UP-regulated in sample group (in comparison to control group) by a mean factor of 14,217 (S.E. range is 8,224 - 23,010).

Dam sample group is different to control group. P(H1)=0,000

**Figure S1. Relative expression of the *dam* gene in the *P. luminescens* *dam*-overexpressing strain.**

qRT-PCR was carried out with total RNA extracted from 3 independent samples of exponentially growing cells of the *dam*-overexpressing strain and of the control strain. Left panel, Box-plot representing the expression ratio between the two strains is represented for the *dam* gene. Right panel, detailed report of the REST-analysis using with *gyrB* and *fis* used as control genes (see Materials & Methods section for details). The level of expression between the 2 strains was different at  $p < 0.001$ .
