# Supplementary material for: Role of the Photorhabdus Dam methyltransferase during interactions with its invertebrate hosts
Source: PubMed Central journal article supplement (PMC6785176; doi:10.1371/journal.pone.0212655), 2019-10-09
Supplement: pone.0212655.s002.pdf [file pone.0212655.s002.pdf]

Fig. S2

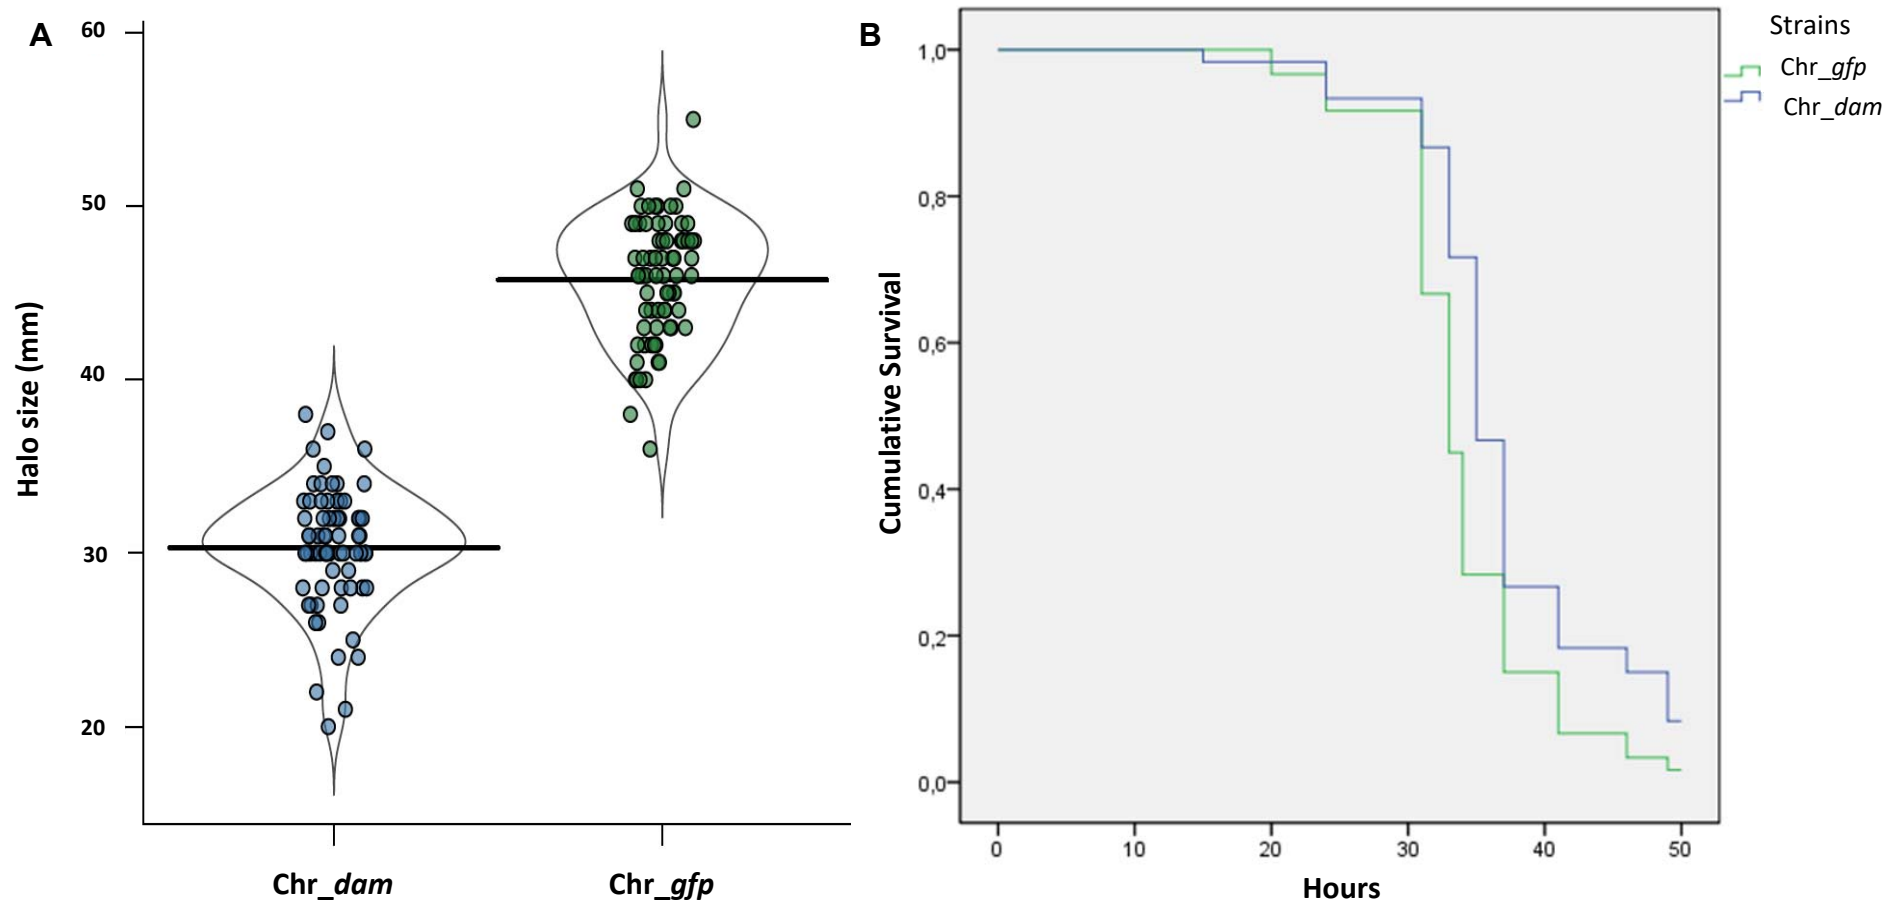

**Figure S2. Motility and pathogenicity of *Chr\_dam* strain.**

(A) Violin-plot of motility halo size for *Chr\_dam* and *Chr\_gfp* strain after 36 hours of growth on motility medium. The difference between the two strains was significant (Wilcoxon test,  $p$ -value $<0.001$ ). (B) Survival of *S. littoralis* larvae after injection of  $10^4$  CFU of *Chr\_gfp* (green) or *Chr\_dam* (blue). *Chr\_dam* strain was significantly delayed (2hours) in the time needed to kill 50 % of the larvae (Wilcoxon test,  $p$ -value $<0.001$ ).
