# Supplementary material for: Role of the Photorhabdus Dam methyltransferase during interactions with its invertebrate hosts
Source: PubMed Central journal article supplement (PMC6785176; doi:10.1371/journal.pone.0212655), 2019-10-09
Supplement: pone.0212655.s003.pdf [file pone.0212655.s003.pdf]

Fig. S3

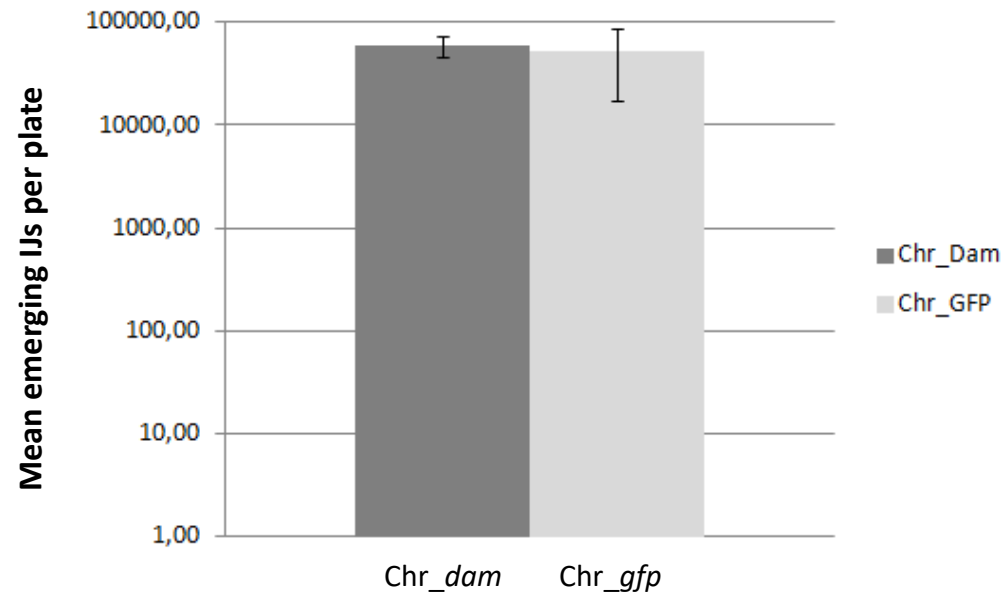

**Figure S3. Emerging IJs from in vitro symbiosis association.**

For each *P. luminescens* strain, three independent cultures were used to establish symbiosis with *H. bacteriophora*. Emerging IJs were then counted and the mean of three biological replicates is represented for Chr\_dam strain (dark grey) and Chr\_gfp (light grey) (see Materials & Methods section for details). The level of emergence between the 2 strains was not significantly different (Wilcoxon,  $p=0.63$ ).
