# Supplementary material for: Role of the Photorhabdus Dam methyltransferase during interactions with its invertebrate hosts
Source: PubMed Central journal article supplement (PMC6785176; doi:10.1371/journal.pone.0212655), 2019-10-09
Supplement: pone.0212655.s004.pdf [file pone.0212655.s004.pdf]

**Table S1:** Primers used in this study

| Primer name  | Use                                                            | Sequence (5'- 3')               |
|--------------|----------------------------------------------------------------|---------------------------------|
| R_GlmS_Sall  | Partial amplification of <i>GlmS</i> for chromosomal insertion | GCGGTCGACTTCAACTAAGGCATTTACAAC  |
| F_GlmS_AatII | Partial amplification of <i>GlmS</i> for chromosomal insertion | GGCGACGTCAACCTTATTCCACCGTCAC    |
| R_RpmE_SacI  | Partial amplification of <i>RpmE</i> for chromosomal insertion | GGCGAGCTCTAGTAAGAAGTTGAAATAAGCC |
| F_RpmE_SpeI  | Partial amplification of <i>RpmE</i> for chromosomal insertion | GCTACTAGTTAAACCCGAGTTATAAGC     |
| L_verif_GlmS | PCR verification of chromosomal insertion                      | TGCGGATACATTAGCAGCAC            |
| R_verif_RpmJ | PCR verification of chromosomal insertion                      | GCACTAATAAGGTTTCATTTTGCAT       |
| plu0004-F    | qRT-PCR on <i>gyrB</i> gene                                    | ATACACGAAGAAGAAGGTGTTTCAG       |
| plu0004-R    | qRT-PCR on <i>gyrB</i> gene                                    | TACCTGTCTGTTTCAGTTTCTCCAAC      |
| plu087-F     | qRT-PCR on <i>dam</i> gene                                     | CTGATGAGTTTATAGTCCACACACG       |
| plu087-R     | qRT-PCR on <i>dam</i> gene                                     | ACCATGAGAATTATAACGACAGAGG       |
| MSRE-10531-F | Determination of the DNA methylation status                    | CAGCACTGACTCTGGAATTAATAAAT      |
| MSRE-10531-R | Determination of the DNA methylation status                    | CCCTTAATAAAAACATGAACTCTCA       |
