# Supplementary material for: Role of the Photorhabdus Dam methyltransferase during interactions with its invertebrate hosts
Source: PubMed Central journal article supplement (PMC6785176; doi:10.1371/journal.pone.0212655), 2019-10-09
Supplement: pone.0212655.s005.pdf [file pone.0212655.s005.pdf]

**Table S2: Phenotypes of *P. luminescens* TT01 Chr\_dam and Chr\_gfp strains**

| Strain <sup>a</sup> | Btb adsorption <sup>b</sup> | Bioluminescence <sup>c</sup> | Antibiotic production <sup>d</sup> | Sheep blood hemolysis <sup>e</sup> | Motility <sup>f</sup> | lecithinase <sup>g</sup> | Lipolysis of <sup>h</sup> |          |          |          |          |
|---------------------|-----------------------------|------------------------------|------------------------------------|------------------------------------|-----------------------|--------------------------|---------------------------|----------|----------|----------|----------|
|                     |                             |                              |                                    |                                    |                       |                          | Tween 20                  | Tween 40 | Tween 60 | Tween 80 | Tween 85 |
| TT01 Chr_Dam        | G                           | +                            | +                                  | -                                  | +                     | +                        | +                         | +        | +        | +        | -        |
| TT01 Chr_GFP        | G                           | +                            | +                                  | -                                  | ++                    | +                        | +                         | +        | +        | +        | -        |
| TT01 WT             | G                           | +                            | +                                  | -                                  | ++                    | +                        | +                         | +        | +        | +        | -        |

<sup>a</sup> All plates were incubated for 2 days at 28°C before assays were interpreted, unless otherwise indicated. Routinely tested phenotypes on the WT strain are indicated for comparison.

<sup>b</sup> Btb, bromothymol blue; G, green-blue colonies on NBTA medium.

<sup>c</sup> +, Luminescence detected by visual observation in a dark room.

<sup>d</sup> +, Halo size (>10 mm) of growth inhibition of *Micrococcus luteus*.

<sup>e</sup> -, No halo of hemolysis detected

<sup>f</sup> +, Reduced spreading area (halo size < 40 mm); ++, Large spreading area (halo size > 40 mm) after 36h of incubation.

<sup>g</sup> +, Halo of opacity around the inoculum indicated the production of lecithinase

<sup>h</sup> +, Halo of precipitation; -, no halo of precipitation
